# Supplementary material for: A new application of polymer supported, homogeneous and reusable catalyst PEG–SO3H in the synthesis of coumarin and uracil fused pyrrole derivatives
Source: Royal Society of Chemistry journal article supplement (doi:10.1039/c2cy20117h), 2012-01-01
Supplement: c2cy20117h.pdf [file c2cy20117h.pdf]

# **A new application of polymer supported, homogeneous and reusable catalyst PEG–SO<sub>3</sub>H in the synthesis of coumarin and uracil fused pyrrole derivatives**

Sanjay Paul<sup>§</sup>, Asish R. Das<sup>§,\*</sup>

<sup>§</sup>*Department of Chemistry, University of Calcutta, Kolkata-700009, India*

\*Corresponding author. Tel.: +913323501014, +919433120265; fax: +913323519754; E-mail address:

[ardchem@caluniv.ac.in](mailto:ardchem@caluniv.ac.in), [ardas66@rediffmail.com](mailto:ardas66@rediffmail.com) (A R Das)

| <u>Content</u>                                                    | <u>Page Numbers</u> |
|-------------------------------------------------------------------|---------------------|
| 1. Materials and Methods.                                         | 2                   |
| 4. <sup>1</sup> HNMR, <sup>13</sup> CNMR Spectra of the Compounds | 3-20                |

## 1. Materials and Methods

$^1\text{H}$ -NMR and  $^{13}\text{C}$ -NMR spectral analysis were carried out on Bruker-Advance Digital 300 MHz and 75.5 MHz instruments; tetramethylsilane (TMS) was used as internal standard. Infrared spectra were recorded in KBr pellets in reflection mode on a Perkin Elmer RX-1 FTIR spectrophotometer. Melting points were determined on a Köfler Block apparatus. Merck aluminum-blocked silica gel plates coated with silica gel G were used for analytical TLC and monitored under UV light and also by exposure to iodine vapor. Synthetic grade chemicals from Sigma-Aldrich, Spectrochem and E-Merck were used for carrying out the organic reactions. All the solvents used in the reaction were distilled and dried over  $\text{Na}_2\text{SO}_4$ .

**1. 3-Phenyl-1*H*-5-oxa-1-azacyclopenta[*a*]naphthalene-4-one (4a):**

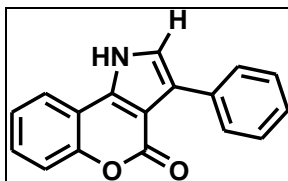

Yield: 81%

Characteristic: Grey amorphous solid

Mp: 295 °C (dec);

IR (KBr): 3109, 1679, 1574, 1462 cm<sup>-1</sup>;

<sup>1</sup>H NMR (300 MHz, DMSO-*d*<sub>6</sub>): δ 7.21-7.44 (6H, m), 7.55 (1H, s), 7.73 (2H, d, *J* = 7.5Hz), 8.05 (1H, d, *J* = 7.5Hz), 12.83 (1H, s);

<sup>13</sup>C NMR (75 MHz, DMSO-*d*<sub>6</sub>): δ 104.6, 113.7, 116.7, 121.3, 122.5, 124.1, 124.5, 126.6, 128.0, 128.6, 128.9, 133.3, 136.5, 151.2, 157.9, 161.9;

Anal. calcd for C<sub>17</sub>H<sub>11</sub>NO<sub>2</sub>: C 78.15, H 4.24, N 5.36 %. Found: C 78.14, H 4.29, N 5.38 %.

HRMS Calcd for C<sub>17</sub>H<sub>11</sub>NO<sub>2</sub> ([M+H]<sup>+</sup>) 262.0869 found : 262.0861

**2. 3-(4-Methoxyphenyl)-1*H*-5-oxa-1-azacyclopenta[*a*]naphthalene-4-one (4b):**

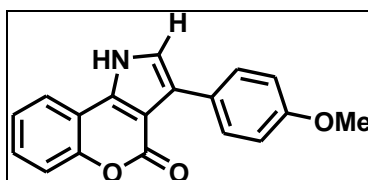

Yield: 85%

Characteristic: Grey amorphous solid

Mp: >300 °C

IR (KBr): 3219, 1685 cm<sup>-1</sup>;

<sup>1</sup>H NMR (300 MHz, DMSO-d<sub>6</sub>): δ 3.74 (3H, s), 6.92 (2H, d, J= 7.8Hz), 7.32-7.46 (4H, m), 7.66 (2H, d, J= 7.8Hz), 8.03 (1H, d, J= 7.2Hz), 12.74 (1H, s);

<sup>13</sup>C NMR (75 MHz, DMSO-d<sub>6</sub>): δ 55.6, 104.9, 113.9, 114.2, 117.0, 121.7, 122.0, 124.5, 124.6, 126.2, 129.2, 130.1, 136.6, 142.5, 151.6, 158.4, 158.6, 162.3;

Anal. calcd for C<sub>18</sub>H<sub>13</sub>NO<sub>3</sub>: C 74.22, H 4.50, N 4.81 %. Found: C 74.26, H 4.48, N 4.78 %.

HRMS Calcd for C<sub>18</sub>H<sub>13</sub>NO<sub>3</sub> ([M+H]<sup>+</sup>) 292.0974 found : 292.0970

### 3. 3-(4-Fluorophenyl)-1H-5-oxa-1-azacyclopenta[a]naphthalene-4-one (4c):

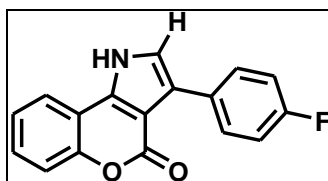

Yield: 73%

Characteristic: Grey amorphous solid

Mp: >300 °C;

IR (KBr): 3113, 1678 cm<sup>-1</sup>;

<sup>1</sup>H NMR (300 MHz, DMSO-d<sub>6</sub>): δ 7.13-7.37 (5H, m), 7.52 (1H, s), 7.75 (2H, s), 8.02 (1H, d, J= 6.9 Hz), 12.79 (1H, s);

<sup>13</sup>C NMR (75 MHz, DMSO-d<sub>6</sub>): δ 104.6, 113.8, 114.7, 114.9, 116.7, 121.4, 122.4, 123.4, 124.2, 128.9, 129.8, 130.4, 130.5, 136.5, 151.2, 158.0, 159.7, 162.9;

Anal. calcd for C<sub>17</sub>H<sub>10</sub>FNO<sub>2</sub>: C 73.11, H 3.61, N 5.02 %. Found: C 73.18, H 3.64 N 5.00 %.

HRMS Calcd for  $C_{17}H_{10}FNO_2$  ( $[M+H]^+$ ) 280.0775 found : 280.0778

**4. 3-*p*-Tolyl-1*H*-5-oxa-1-azacyclopenta[*a*]naphthalene-4-one(4d) :**

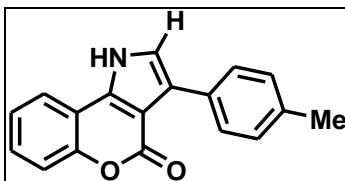

Yield: 82%

Characteristic: Yellow amorphous solid

Mp: >300 °C;

IR (KBr): 3185, 1690  $cm^{-1}$ ;

$^1H$  NMR (300 MHz, DMSO- $d_6$ ):  $\delta$  2.28 (3H, s), 7.15 (2H, d,  $J=7.8Hz$ ), 7.30-7.45 (3H, m), 7.49 (1H, s), 7.62 (2H, d,  $J=7.5 Hz$ ), 8.03 (1H, d,  $J=7.5 Hz$ ), 12.76 (1H, s);

$^{13}C$  NMR (75 MHz, DMSO- $d_6$ ):  $\delta$  20.8, 104.6, 113.8, 116.7, 121.3, 122.0, 124.1, 124.5, 128.5, 128.8, 130.5, 135.6, 136.3, 151.2, 157.9;

Anal. calcd for  $C_{18}H_{13}NO_2$ : C 78.53, H 4.76, N 5.09 %. Found: C 78.59, H 4.73, N 5.05 %.

HRMS Calcd for  $C_{18}H_{13}NO_2$  ( $[M+H]^+$ ) 276.1025 found : 276.1019

**5. 3-(3-Nitrophenyl)-1*H*-5-oxa-1-azacyclopenta[*a*]naphthalene-4-one (4e):**

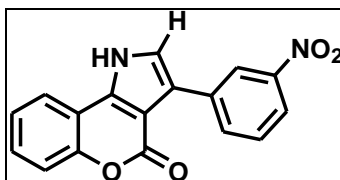

Yield: 79%

Characteristic: Yellow amorphous solid

Mp: 290 °C (dec);

IR (KBr): 3117, 1678  $\text{cm}^{-1}$ ;

$^1\text{H}$  NMR (300 MHz,  $\text{DMSO-d}_6$ ):  $\delta$  7.36-7.64 (4H, m), 7.83 (1H, s), 8.05-8.22 (3H, m), 8.69 (1H, s), 13.03 (1H, s);

$^{13}\text{C}$  NMR (75 MHz,  $\text{DMSO-d}_6$ ):  $\delta$  113.5, 116.8, 117.8, 121.2, 121.9, 122.7, 123.9, 124.3, 129.5, 134.7, 135.0, 137.1, 147.9, 151.2, 158.0, 161.9;

Anal. calcd for  $\text{C}_{17}\text{H}_{10}\text{N}_2\text{O}_4$ : C 66.67, H 3.29, N 9.15 %. Found: C 66.63, H 3.30, N 9.19 %.

HRMS Calcd for  $\text{C}_{17}\text{H}_{10}\text{N}_2\text{O}_4$  ( $[\text{M}+\text{H}]^+$ ) 307.0720 found : 307.0728

**6. 3-(4-Chlorophenyl)-1H-5-oxa-1-azacyclopenta[*a*]naphthalene-4-one (4f):**

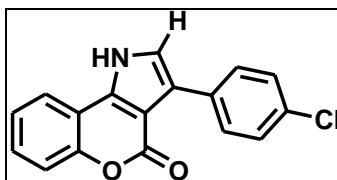

Yield: 77%

Characteristic: Yellow amorphous solid

Mp: 296  $^{\circ}\text{C}$  (dec);

IR (KBr): 3114, 1684  $\text{cm}^{-1}$ ;

$^1\text{H}$  NMR (300 MHz,  $\text{DMSO-d}_6$ ):  $\delta$  7.31-7.41 (5H, m), 7.60 (1H, s), 7.77 (2H, d,  $J= 8.1\text{Hz}$ ), 8.03 (1H, d,  $J= 7.5\text{ Hz}$ ), 12.86 (1H, s);

$^{13}\text{C}$  NMR (75 MHz,  $\text{DMSO-d}_6$ ):  $\delta$  104.5, 113.6, 116.7, 121.3, 122.8, 122.9, 124.1, 127.9, 129.0, 130.1, 131.1, 132.2, 136.7, 151.2, 157.9;

Anal. Calcd for  $\text{C}_{17}\text{H}_{10}\text{ClNO}_2$ : C 69.05, H 3.41, N 4.74%. Found: C 69.02, H 3.48, N 4.77%.

HRMS Calcd for  $\text{C}_{17}\text{H}_{10}\text{ClNO}_2$  ( $[\text{M}+\text{H}]^+$ ) 296.0479 found : 296.0471

**7. 3-(3-Hydroxy-4-methoxyphenyl)-1H-5-oxa-1-azacyclopenta[*a*]naphthalene-4-one (4g):**

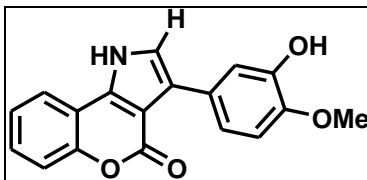

Yield: 78%

Characteristic: Yellow amorphous solid

Mp: >300 °C;

IR (KBr): 3134, 1657 cm<sup>-1</sup>;

<sup>1</sup>H NMR (300 MHz, DMSO-*d*<sub>6</sub>): δ 3.75 (3H, s), 6.89 (1H, d, J=8.1Hz), 7.11-7.55 (6H, m), 8.03 (1H, d, J=7.5Hz), 8.85 (1H, s), 12.71 (1H, s);

<sup>13</sup>C NMR (75 MHz, DMSO-*d*<sub>6</sub>): δ 56.2, 104.7, 112.4, 114.2, 116.7, 117.0, 120.0, 121.7, 122.1, 124.5, 125.0, 126.7, 129.2, 136.5, 146.4, 147.2, 151.5, 158.3, 162.3;

Anal. calcd for C<sub>18</sub>H<sub>13</sub>NO<sub>4</sub>: C 70.35, H 4.26, N 4.56 %. Found: C 70.38, H 4.28, N 4.59 %.

HRMS Calcd for C<sub>18</sub>H<sub>13</sub>NO<sub>4</sub> ([M+H]<sup>+</sup>) 308.0924 found : 308.0928

**8. 3-(4-Nitrophenyl)-1H-5-oxa-1-azacyclopenta[*a*]naphthalene-4-one (4h)**

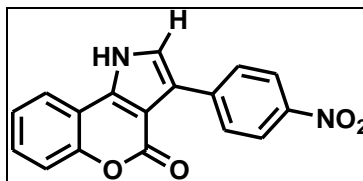

Yield: 72%

Characteristic: Yellow amorphous solid

Mp: 290 °C (dec);

IR (KBr): 3158, 1680  $\text{cm}^{-1}$ ;

$^1\text{H}$  NMR (300 MHz,  $\text{DMSO-d}_6$ ):  $\delta$  7.30-7.37 (4H, m) 7.73 (1H, s), 8.03-8.15 (4H, m), 12.98 (1H, s);

$^{13}\text{C}$  NMR (75 MHz,  $\text{DMSO-d}_6$ ):  $\delta$  104.7, 113.8, 116.8, 118.8, 121.2, 121.4, 121.9, 122.7, 123.9, 124.9, 129.3, 129.5, 134.7, 135.0, 137.1, 147.9, 151.5, 157.7, 161.7;

Anal. calcd for  $\text{C}_{17}\text{H}_{10}\text{N}_2\text{O}_4$ : C 66.67, H 3.29, N 9.15 %. Found: C 66.63, H 3.30, N 9.19 %.

HRMS Calcd for  $\text{C}_{17}\text{H}_{10}\text{N}_2\text{O}_4$  ( $[\text{M}+\text{H}]^+$ ) 307.072 found : 307.0719

### 9. 5-Phenyl-1,7-dihydropyrrolo[2,3-*d*]pyrimidine-2,4-dione(4i):

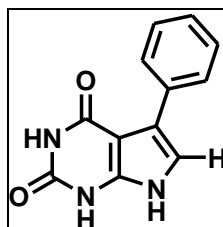

Yield: 71%

Characteristic: Pink powder

Mp: 250  $^{\circ}\text{C}$  (dec);

IR (KBr): 3131, 1738, 1663,  $\text{cm}^{-1}$ ;

$^1\text{H}$  NMR (300 MHz,  $\text{DMSO-d}_6$ ):  $\delta$  6.84 (1H, s) 7.15-7.78 (5H, m), 10.46 (1H, s), 11.24 (1H, s), 11.49 (1H, s);

$^{13}\text{C}$  NMR (75 MHz,  $\text{DMSO-d}_6$ ):  $\delta$  96.2, 115.2, 121.4, 126.3, 128.2, 128.3, 134.3, 140.9, 151.1, 160.5;

Anal. calcd for  $\text{C}_{12}\text{H}_9\text{N}_3\text{O}_2$ : C 63.43, H 3.99, N 18.49 %. Found: C 63.41, H 3.96, N 18.51 %.

HRMS Calcd for  $\text{C}_{12}\text{H}_9\text{N}_3\text{O}_2$  ( $[\text{M}+\text{H}]^+$ ) 228.0774 found : 228.0771

### 10. 5-(4-Methoxyphenyl)-1,7-dihydropyrrolo[2,3-*d*]pyrimidine-2,4-dione(4j):



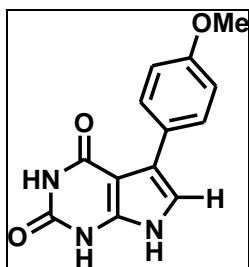

Yield: 75%

Characteristic: Pink powder

Mp: 270 °C (dec);

IR (KBr): 3135, 1736, 1663, 1601 cm<sup>-1</sup>;

<sup>1</sup>H NMR (300 MHz, DMSO-d<sub>6</sub>): δ 3.70 (3H, s), 6.74 (1H, s), 6.83 (2H, d, J=8.4 Hz), 7.70(2H, d, J=8.4Hz), 10.42 (1H, s), 11.14 (1H, s), 11.43 (1H, s);

<sup>13</sup>C NMR (75 MHz, DMSO-d<sub>6</sub>): δ 56.7, 96.1, 113.3, 114.1, 117.8, 120.7, 128.9, 142.6, 150.9, 161.9;

Anal. calcd for C<sub>13</sub>H<sub>11</sub>N<sub>3</sub>O<sub>3</sub>: C 60.70, H 4.31, N 16.33 %. Found: C 60.73, H 4.30, N 16.35 %.

HRMS Calcd for C<sub>13</sub>H<sub>11</sub>N<sub>3</sub>O<sub>3</sub> ([M+H]<sup>+</sup>) 258.0879 found : 258.0870

#### 11. 5-(4-Fluorophenyl)-1,7-dihydropyrrolo[2,3-d]pyrimidine-2,4-dione(4j):

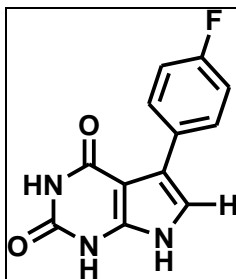

Yield: 68%

Characteristic: Pink powder

Mp: 281 °C (dec);

IR (KBr): 3138, 1734, 1604 cm<sup>-1</sup>;

<sup>1</sup>H NMR (300 MHz, DMSO-d<sub>6</sub>): δ 6.85 (1H, s), 7.09 (2H, d, J=7.5Hz), 7.82 (2H, d, J=7.5Hz), 10.48 (1H, s), 11.26 (1H, s), 11.50 (1H, s);

<sup>13</sup>C NMR (75 MHz, DMSO-d<sub>6</sub>): δ 95.7, 114.5, 114.7, 119.8, 129.5, 129.6, 130.4, 140.5, 150.7, 160.1;

Anal. calcd for C<sub>12</sub>H<sub>8</sub>FN<sub>3</sub>O<sub>2</sub>: C 58.78, H 3.29, N 17.14 %. Found: C 58.80, H 3.27, N 17.18 %.

HRMS Calcd for C<sub>12</sub>H<sub>8</sub>FN<sub>3</sub>O<sub>2</sub> ([M+H]<sup>+</sup>) 246.068 found : 246.0678

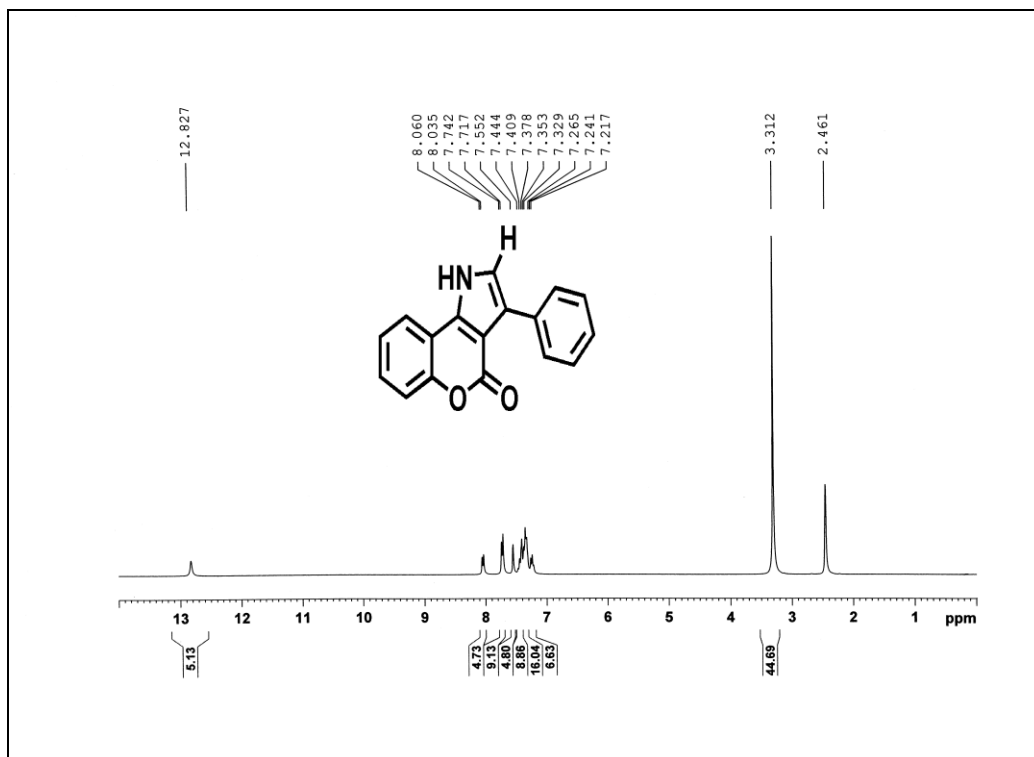

**Figure 1a** <sup>1</sup>H NMR spectrum of the product (4a)

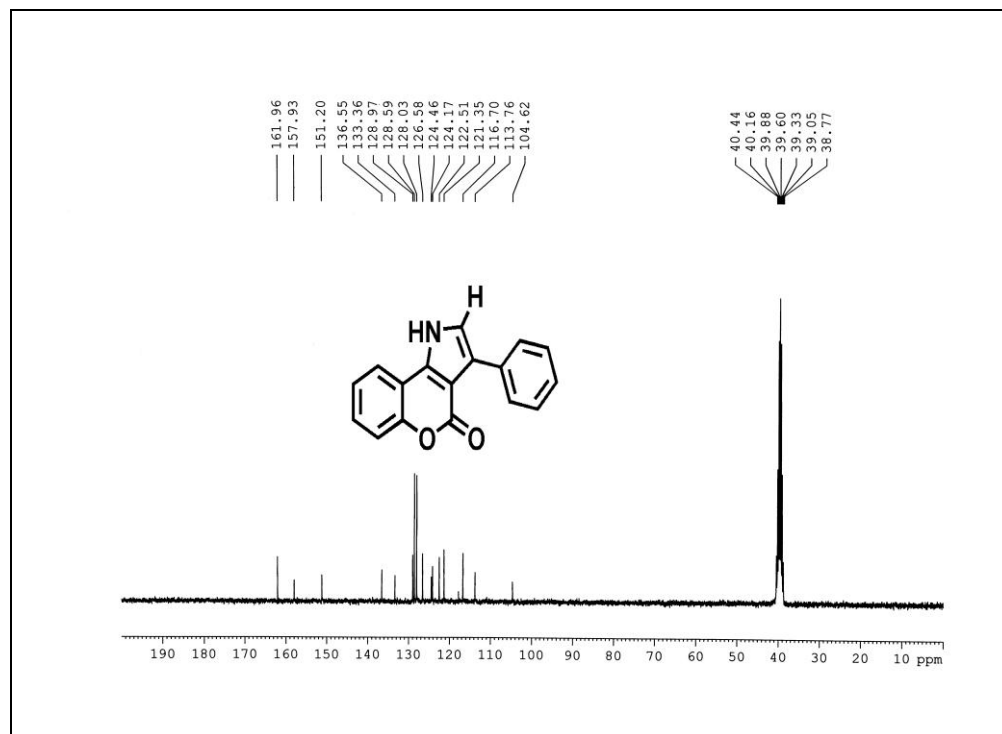

**Figure 1b** <sup>13</sup>C NMR spectrum of the product (4a)

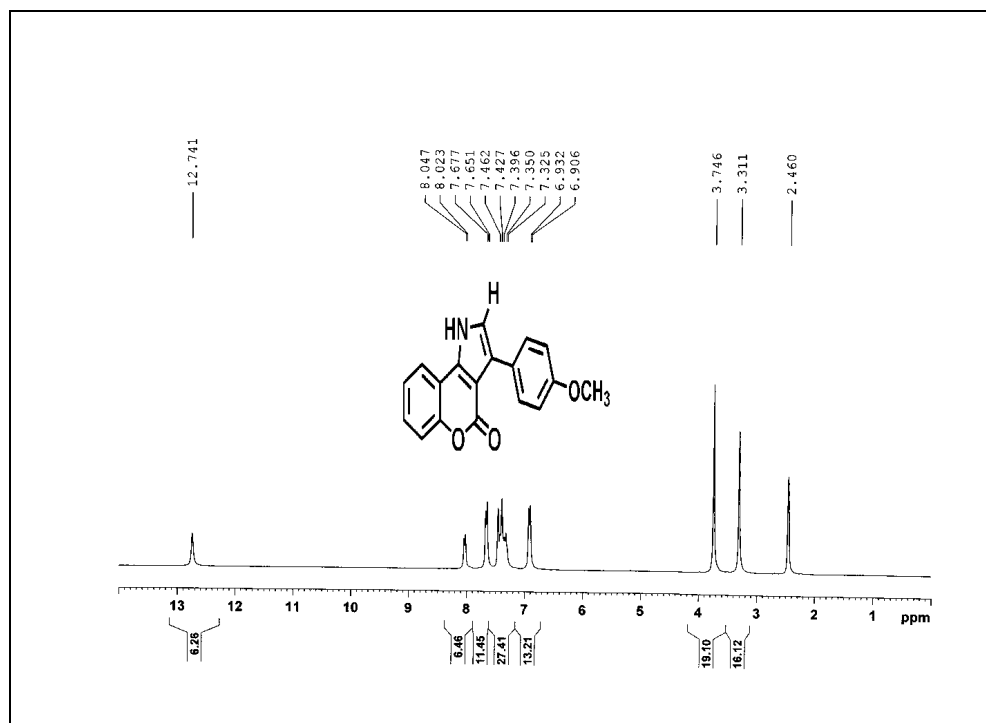

Figure2a <sup>1</sup>H NMR spectrum of the product (4b)

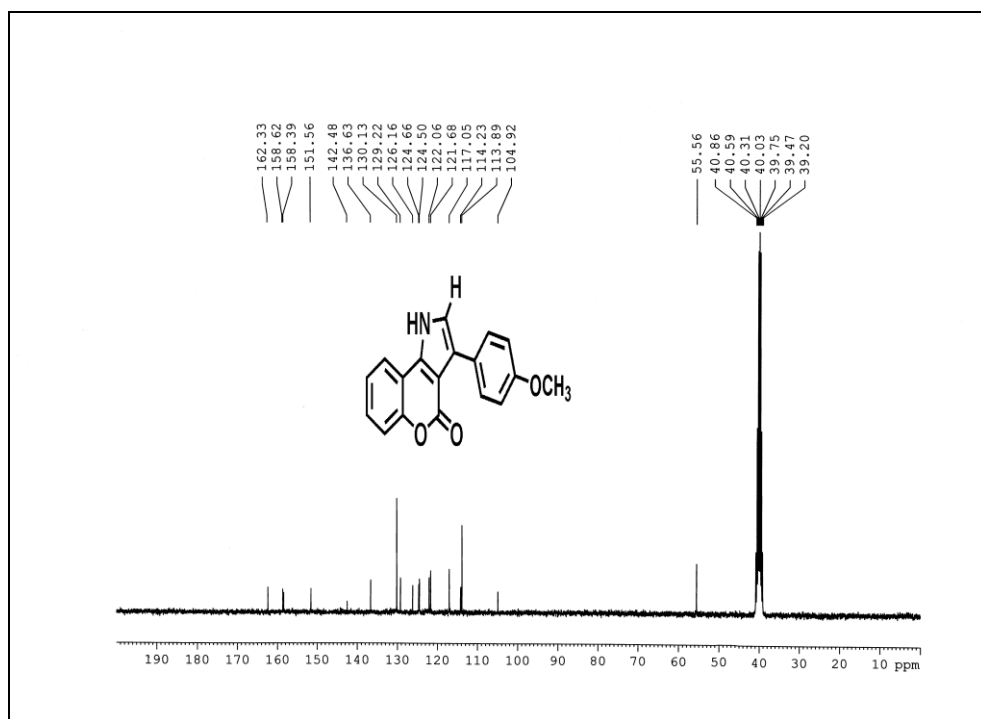

Figure2b <sup>13</sup>C NMR spectrum of the product (4b)

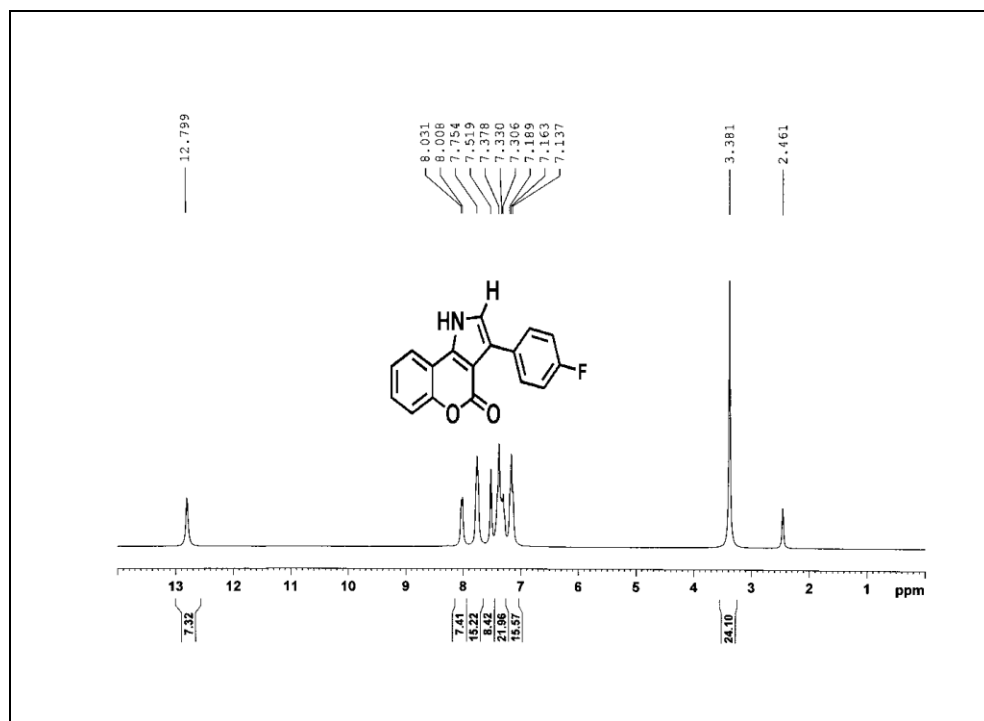

**Figure3a** <sup>1</sup>H NMR spectrum of the product (4c)

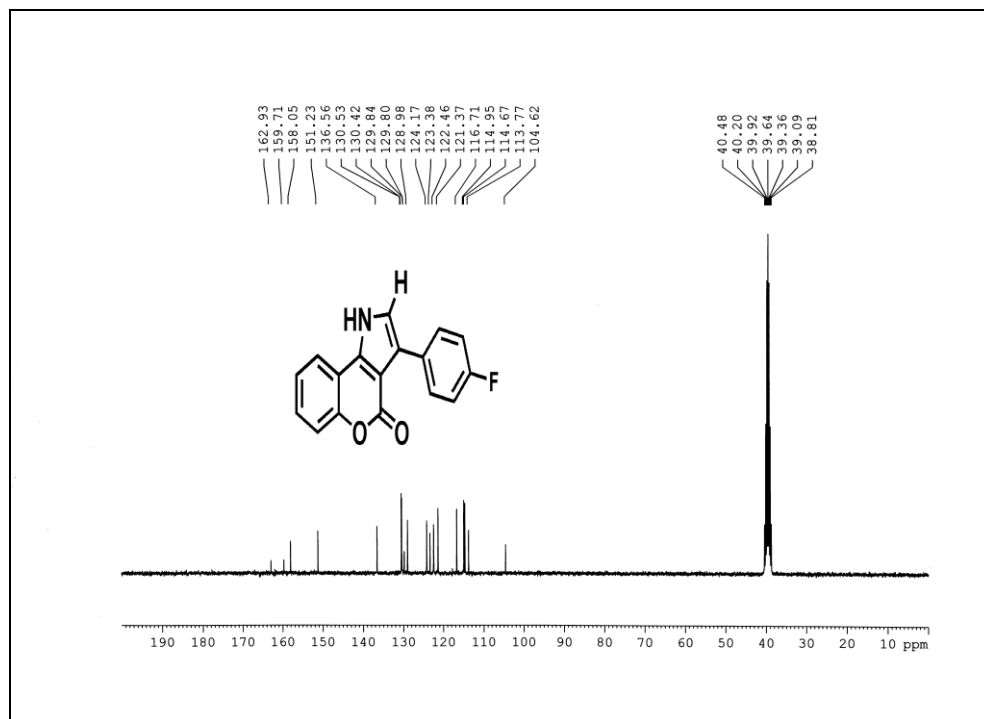

**Figure3b** <sup>13</sup>C NMR spectrum of the product (4c)

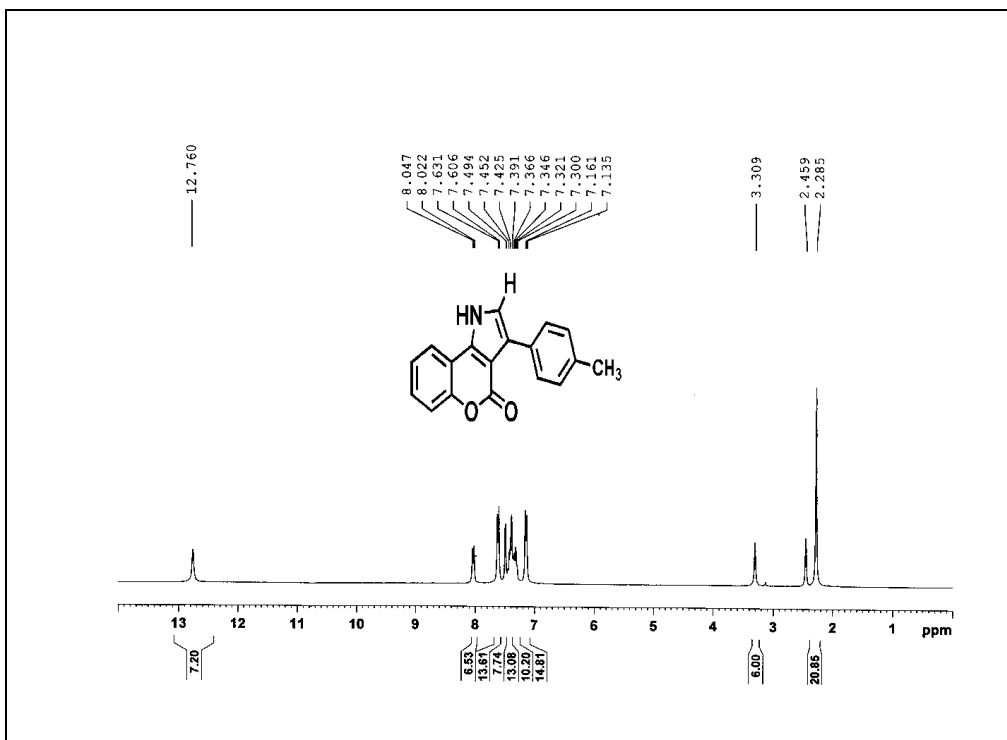

**Figure 4a**  $^1\text{H}$  NMR spectrum of the product (4d)

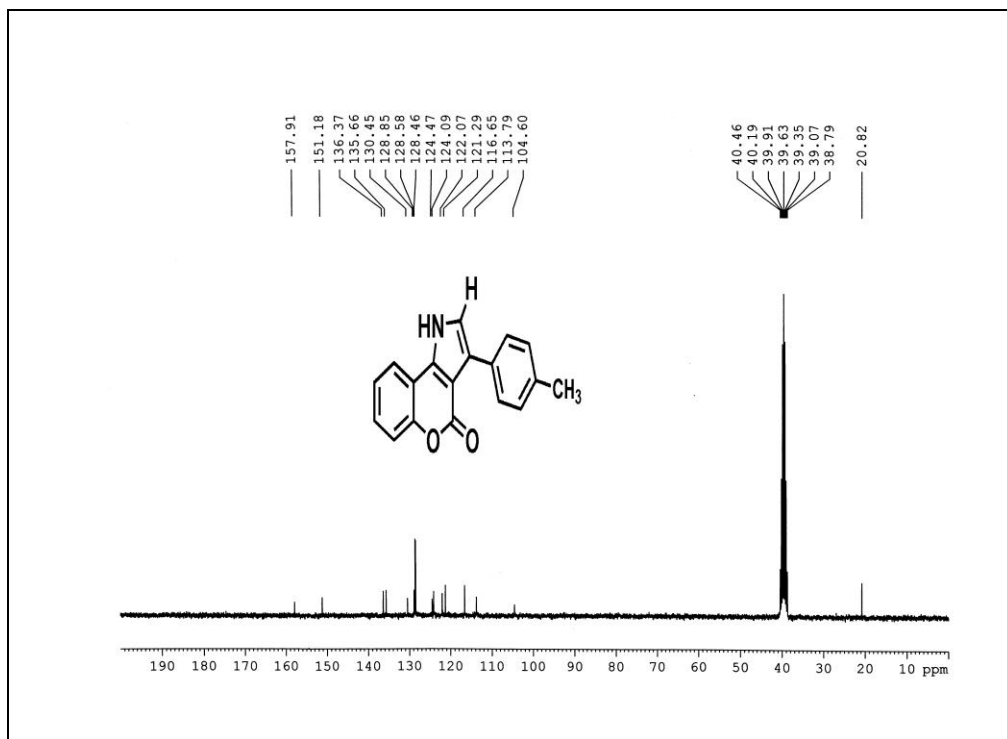

**Figure 4b**  $^{13}\text{C}$  NMR spectrum of the product (4d)

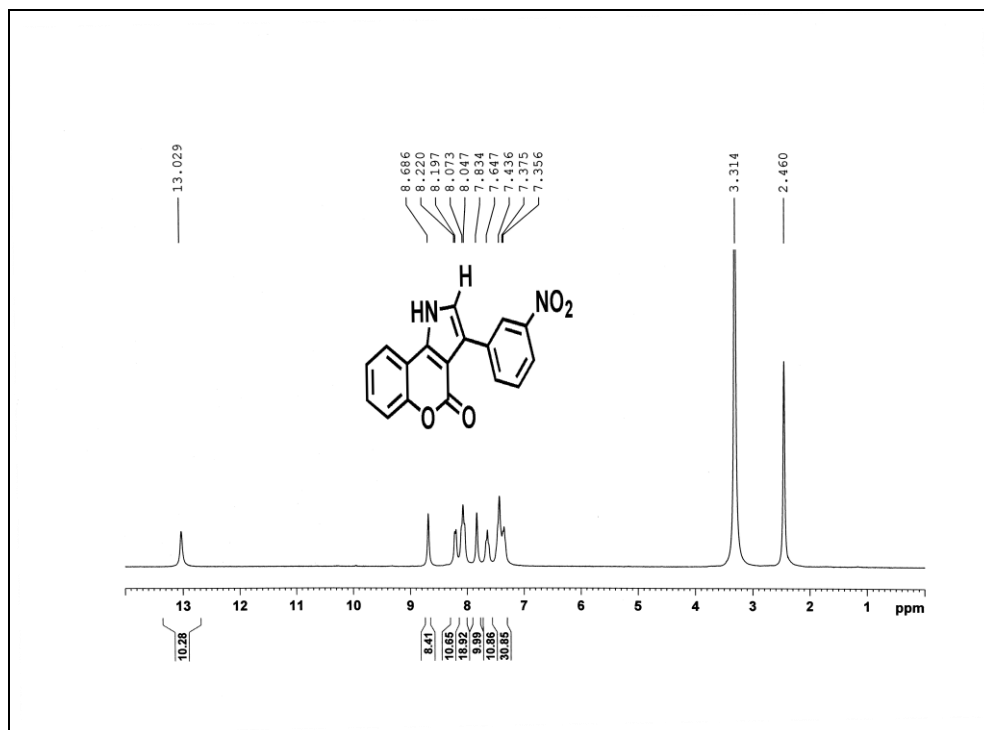

Figure 5a  $^1\text{H}$  NMR spectrum of the product (4e)

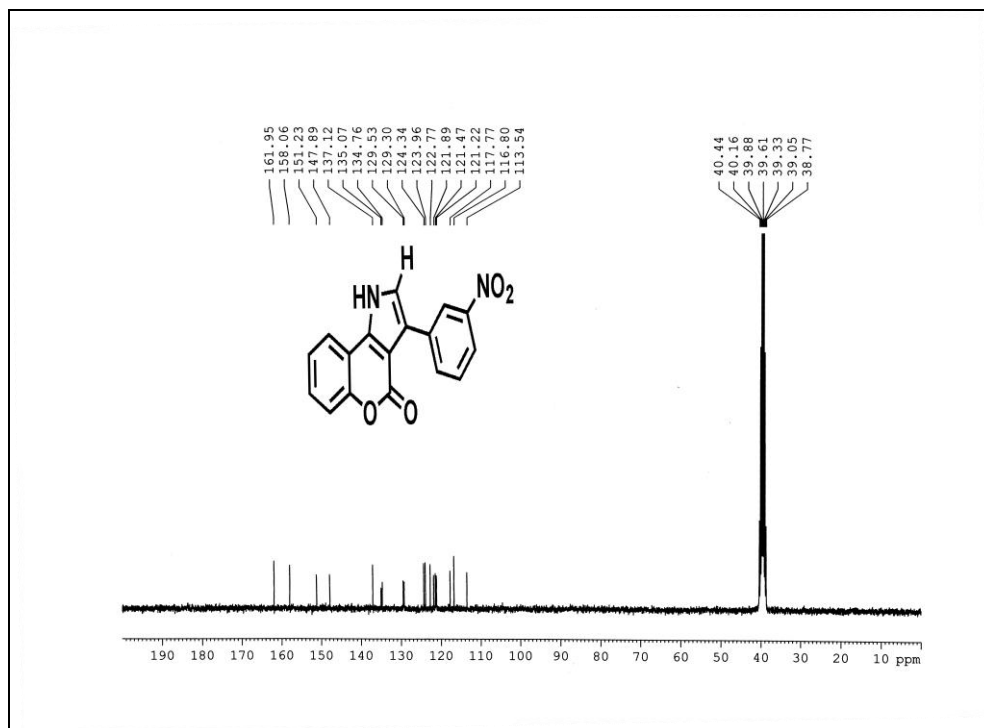

Figure 5b  $^{13}\text{C}$  NMR spectrum of the product (4e)

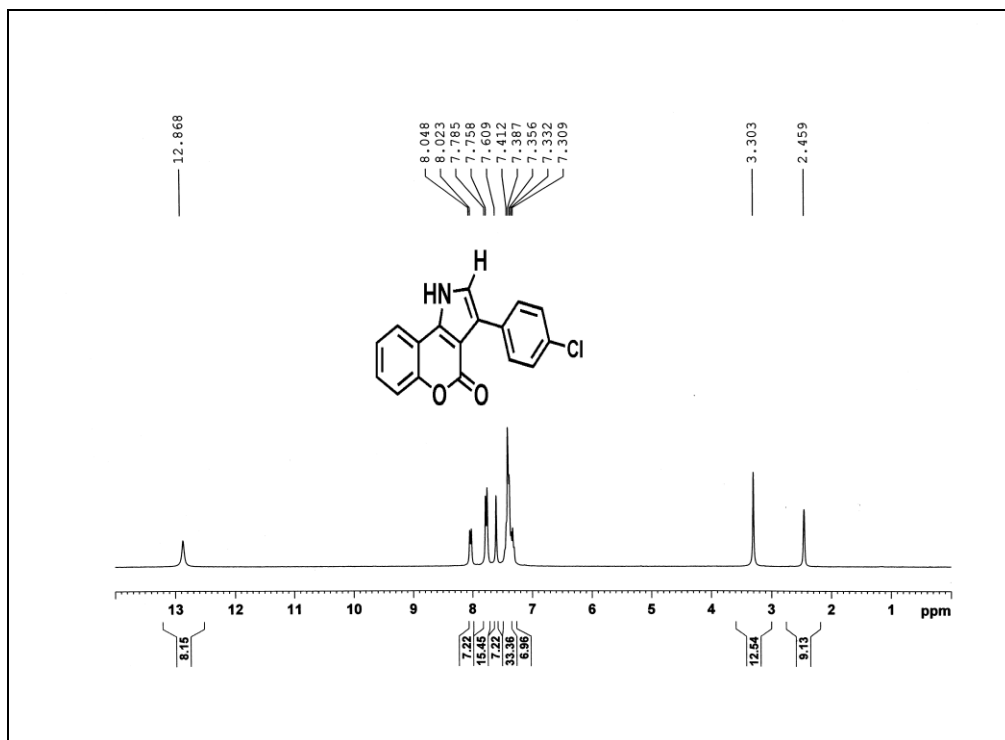

**Figure 6a**  $^1\text{H}$  NMR spectrum of the product (4f)

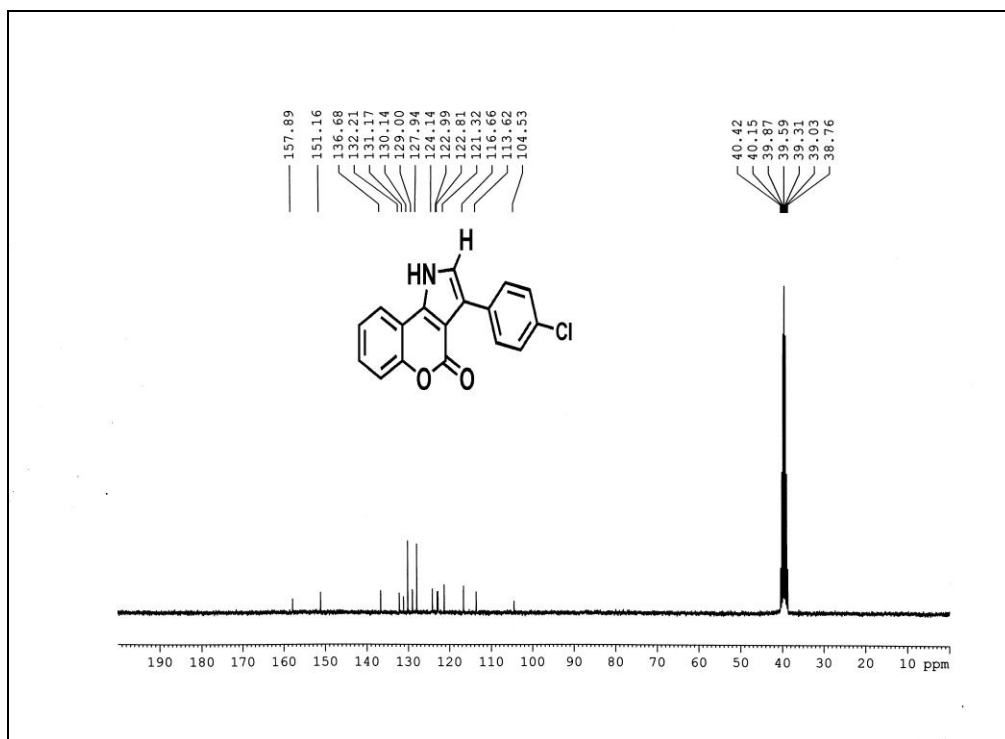

**Figure 6b**  $^{13}\text{C}$  NMR spectrum of the product (4f)



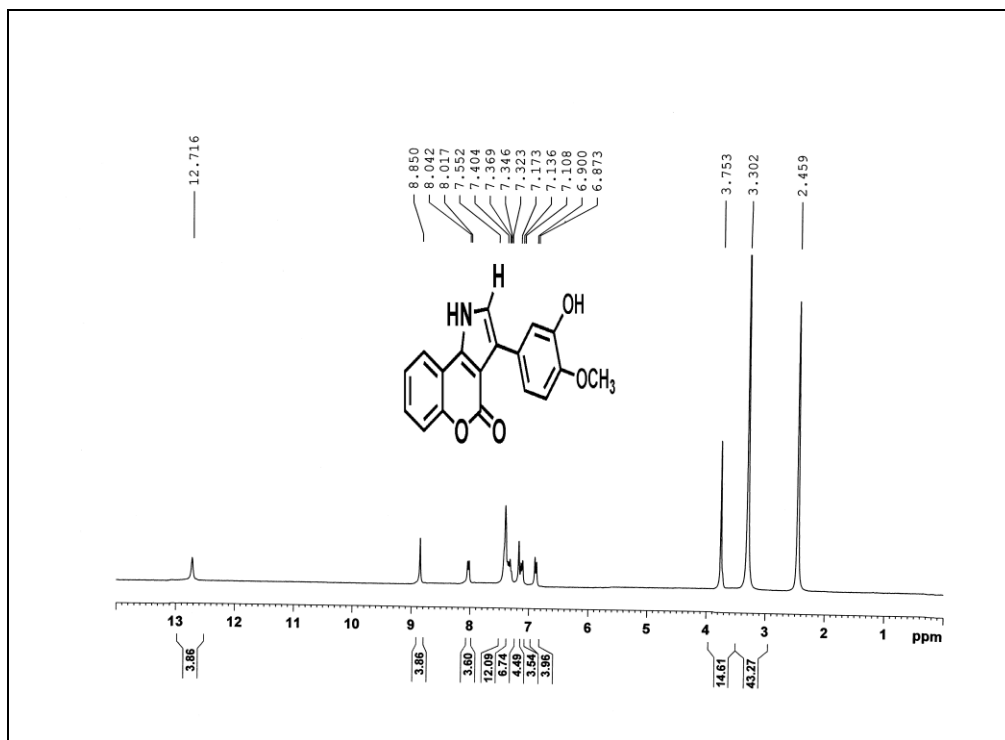

**Figure7a** <sup>1</sup>H NMR spectrum of the product (4g)

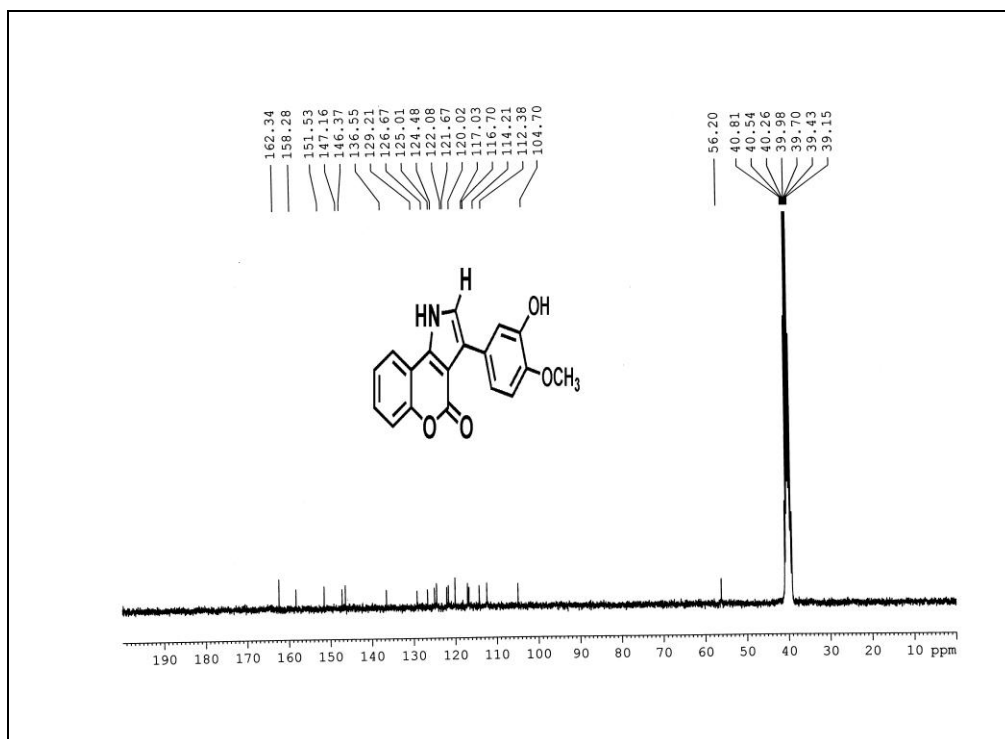

**Figure7b** <sup>13</sup>C NMR spectrum of the product (4g)

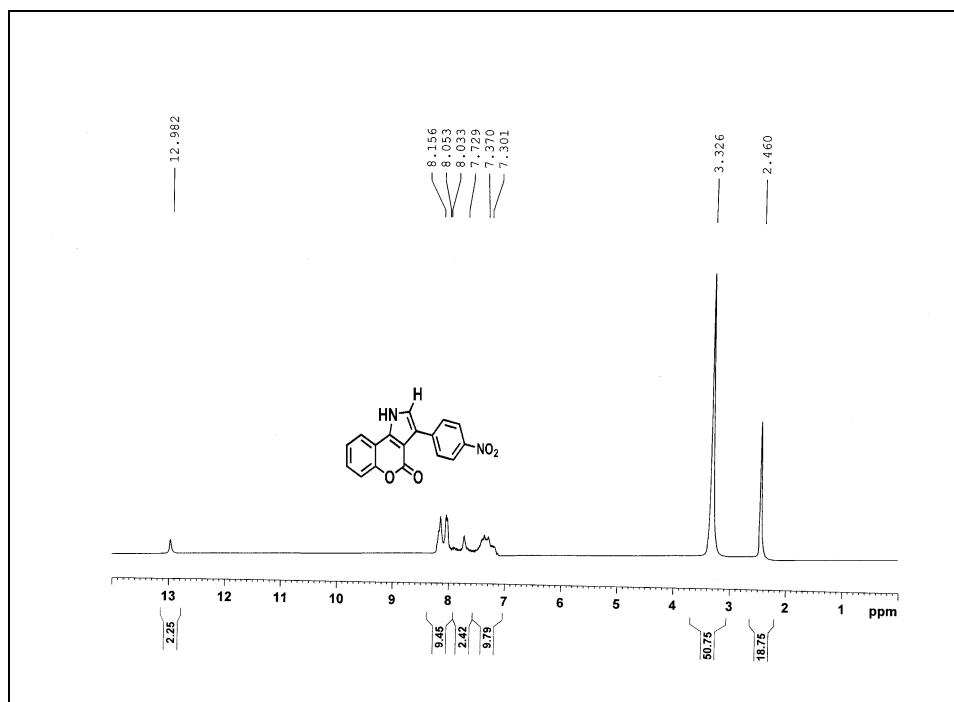

**Figure8a** <sup>1</sup>H NMR spectrum of the product (4h)

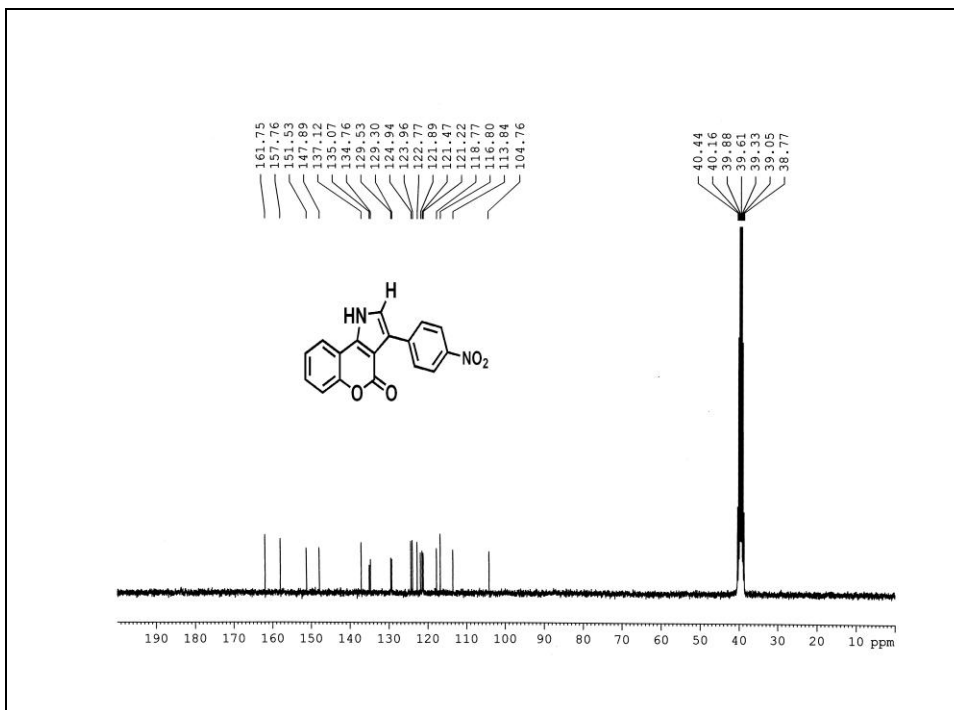

**Figure8b** <sup>13</sup>C NMR spectrum of the product (4h)

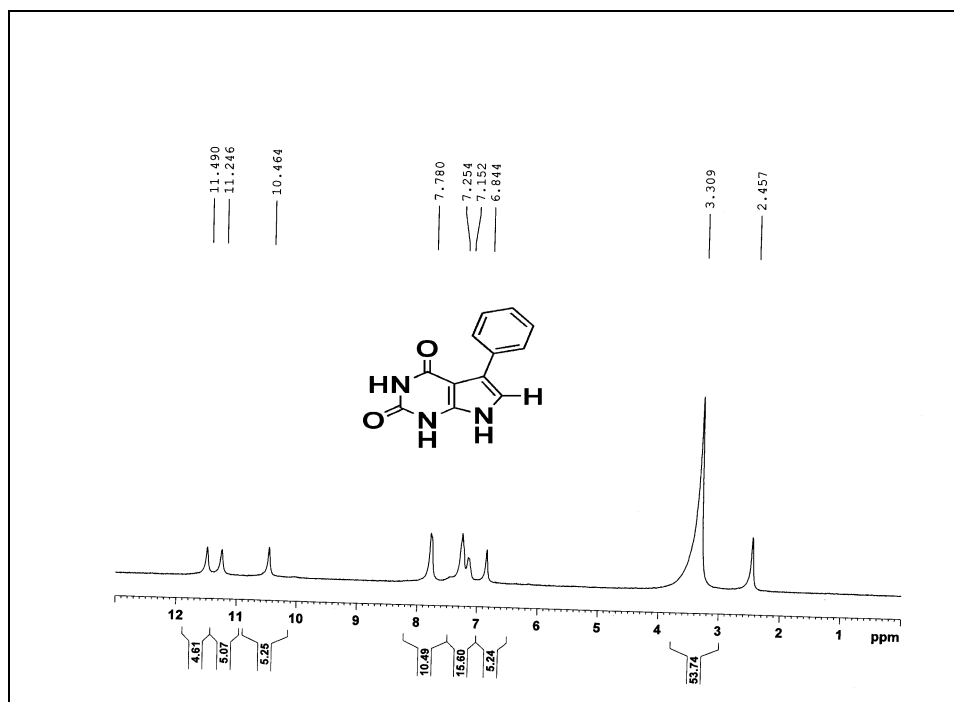

Figure9a <sup>1</sup>H NMR spectrum of the product (4i)

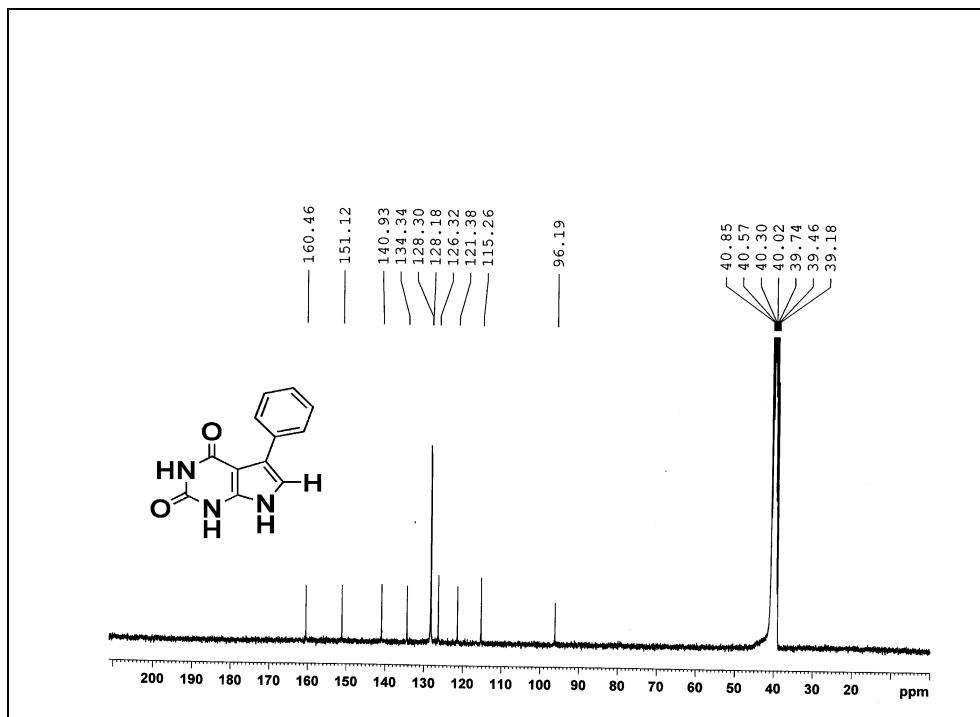

Figure9b <sup>13</sup>C NMR spectrum of the product (4i)

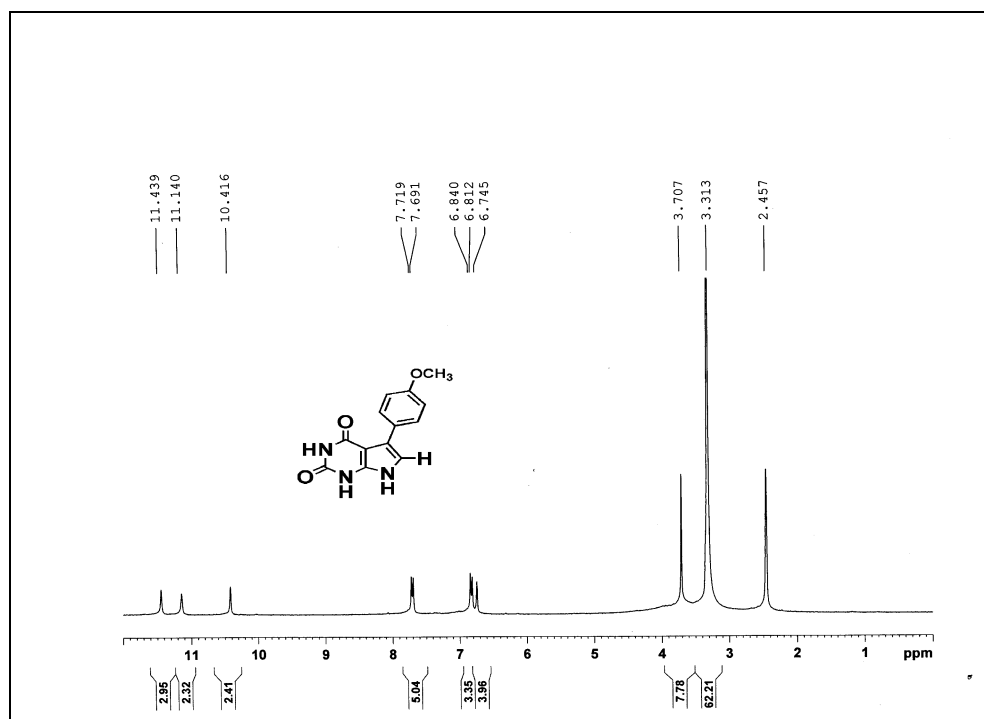

Figure10a <sup>1</sup>H NMR spectrum of the product (4j)

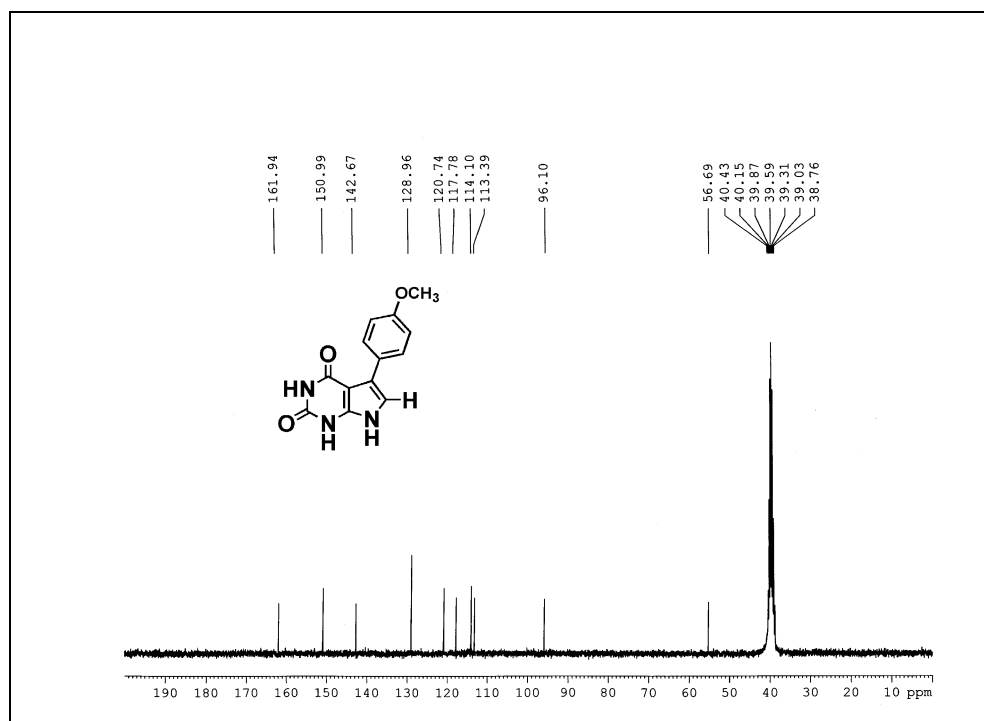

Figure10b <sup>13</sup>C NMR spectrum of the product (4j)

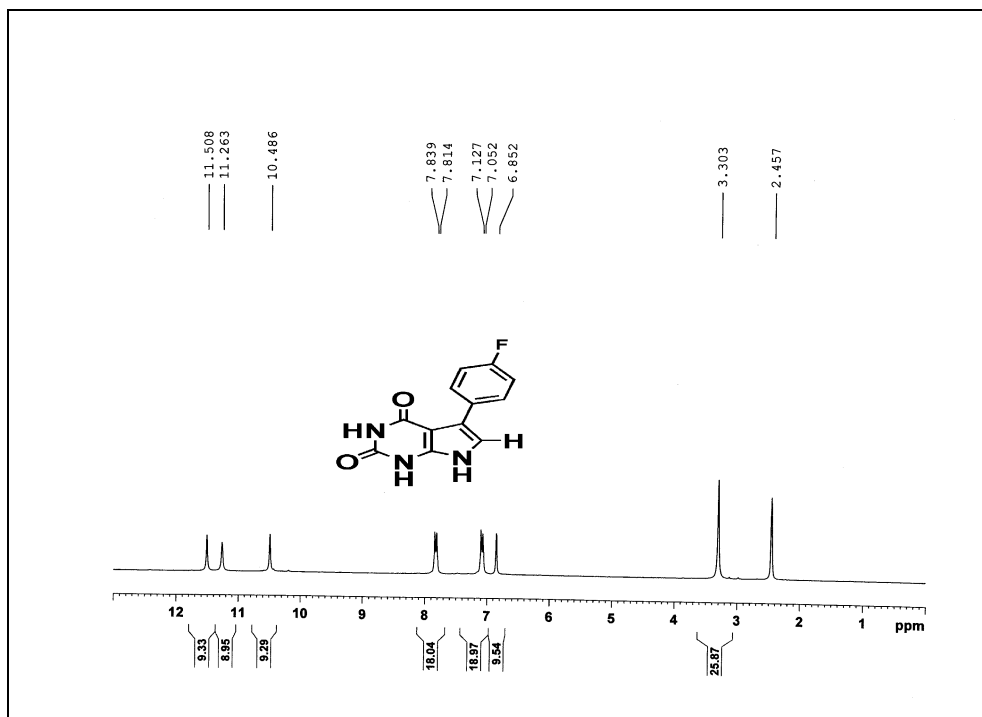

Figure 11a <sup>1</sup>H NMR spectrum of the product (4k)

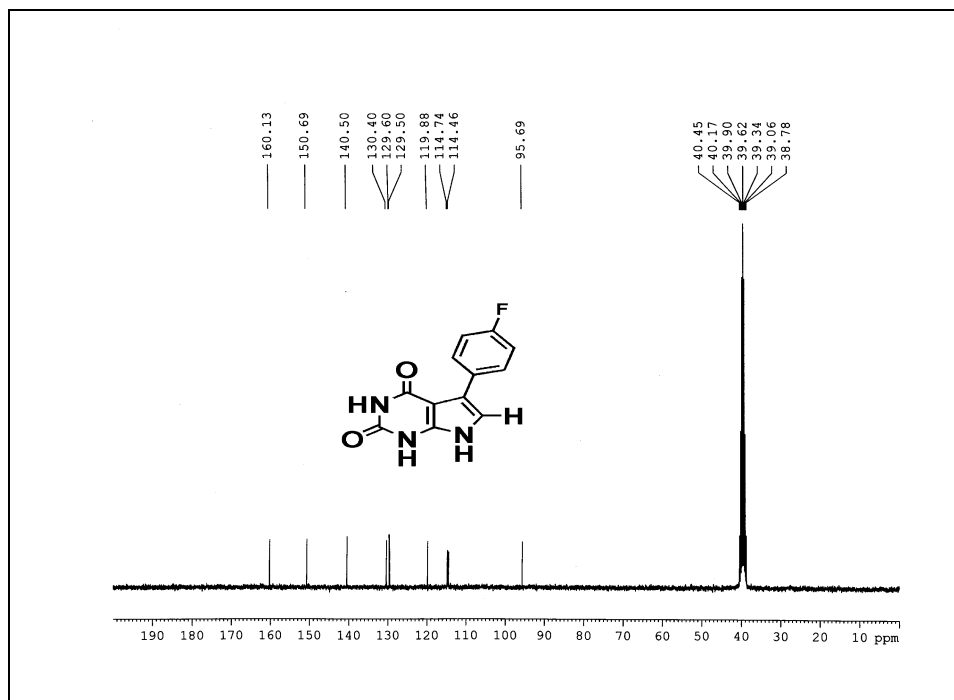

Figure 11b <sup>13</sup>C NMR spectrum of the product (4k)
